# Supplementary material for: Changes of cirrus cloud properties and occurrence over Europeduring the COVID-19 caused air traffic reduction
Source: Copernicus journal article supplement (doi:10.5194/acp-2021-172), 2021-03-09
Supplement: Supplementary file [file acp-2021-172-AC2-supplement.pdf]

## Response to Review RC2 by Referee #2.

We thank the Referee for carefully reading our manuscript and for the suggestions and specific comments to improve the current work. In the following the Referee's comments are repeated in black and our responses follow in blue.

Review of

### **Changes of cirrus cloud properties and occurrence over Europe during the COVID-19 caused air traffic reduction**

Qiang Li and Silke Groß

**General:** Based on CALIPSO satellite lidar measurements, changes of cirrus cloud properties and occurrence caused by the air traffic reduction in March-April 2020 are investigated in this study. For this purpose, the meteorological situations of March-April of previous years were first analyzed in order to find years that are comparable to 2020, so that differences found between these years and 2020 can be clearly attributed to the reduced air traffic. The findings presented are reduced cirrus cloud occurrences and thicknesses and also smaller mean values of cirrus linear depolarization ratio, especially at temperatures colder than  $T < -50^{\circ} \text{C}$ .

The study fits well into the scope of ACP, is very interesting and of high relevance, especially from the perspective of ongoing anthropogenic impact on climate. The manuscript is clearly structured and fluently written, though unfortunately **the phrasing is confusing at times**, to my feeling due to language difficulties. Therefore, I recommend a language check.

→ Thank you.

Regarding the methods used in the study, I regret to say that I do not consider them to be scientifically mature. First, the physical understanding of cirrus and contrail formation seems to need some improvement (see comments in the introduction). Next, the analysis of the similarity of the years: it is performed for March to April, but in the following analysis March and April are treated separately. I would recommend an analysis as in Figure 1 for both months and then a separate choice of years similar to 2020.

→ We agree that it would be better to treat the two months separately in the meteorological discussion. We accordingly changed the meteorological analysis. We furthermore added more parameters in this discussion. We find a large variability in the meteorological conditions for the years from 2014 to 2019 with the conditions of 2020 in both March and April well within the spread. In March, 2018 and 2020 are the outliers with higher temperatures and lower RHi at altitudes above 10 km. In April, however, the only 'outstanding' year is 2016, which showed significantly higher temperature and lower RHi values. We furthermore extended our analysis for all the years from 2014 to 2019 for our comparison. The results provide strong support to our statement that the cirrus cloud cover and properties did not change in the former years but show significant reduction in March/April 2020. Only the meteorological conditions in 2016 led to a stronger reduction in cirrus cloud occurrence. However, the cirrus clouds in 2016 did not show the reduction in PLDR as it was found in 2020.

Here are some more examples of what I mean by a not mature analysis (more explanations are given in the specific comments): the years similar to 2020 are defined, but in the analysis one other year is used; Table 2 is not very informative; the estimate of the overall reduction in OR (cirrus occurrence rate) is too high, etc.

However, my major problem with the paper are the further analyzes and interpretations. First, the OR for all cirrus are considered. But when analyzing the PLDR (particle linear depolarization ratio), two temperature ranges are introduced, namely the one in which contrails can develop (at temperatures below about  $-50^{\circ}\text{C}$  where the Schmidt- Appleman criterion is fulfilled) and the other at warmer temperatures, i.e. where the influence of aviation is at the most very small, but most likely not existing. I would say that if the reduction in cirrus is caused by air traffic, then this should only be seen in the cold temperatures, for both OR and PLDR. If the reduction is to be found at all altitudes (which seems to be the case from what I see in the presented material), this points to another reason. I can imagine that using years to compare with 2020 for March and April separately would give clearer results. I also suggest to perform the analysis of both OR and PLDR for the two temperature ranges.

→ We agree with this Reviewer that not only PLDR should be considered for the two temperature ranges but also for the OR. Thank you for the suggestions. We changed our analysis accordingly and found that a clear reduction in cirrus OR was found at temperatures below  $-50^{\circ}\text{C}$ , while at warmer temperatures cirrus OR in April 2020 were slightly smaller than in the reference years at lower altitudes below 9 km and became close to and even slightly larger than the other years at higher altitudes.

In summary, I would strongly encourage the authors to repeat the analysis by taking into account the recommendations outlined above and in the specific comments to present robust and important results on the aviation influence on cirrus occurrence and properties. After that, the article should be published in ACP.

→ We thank this Reviewer for his/her valuable comments and repeated our analysis accordingly. Please find the specific answers following the different suggestions.

The specific comments are organized as follows: Text from the manuscript is shown in quotation marks, the comments are without.

#### **Specific comments:**

1) Page 1, lines 20-21: ‘... ice crystals in air form and grow as a function of temperature and ice supersaturation ...’ The major driver is the vertical velocity.

→ We agree, that the vertical velocity was missing. We added this and also analyzed the vertical velocity in our meteorological analysis. Although there was a large variability in the profiles of vertical velocity in different years (2014, 2015, 2017, and 2019), cirrus occurrence did not show clear difference. The specific case (such as April 2016) showed that cirrus occurrence is more dependent on the temp and RH<sub>i</sub> than vertical velocity.

2) Page 1, lines 20-21: ‘... there is a general trend toward larger morphological complexity as the supersaturation increases as well as the temperature drops...’

The morphological complexity decreases when the temperature drops. The colder it is, the more the ice particles tend towards spherical shapes, as there is not enough water available to form more complex shapes (see e.g. Lawson et al., 2019, JGR, Figure 22) or [https://www.researchgate.net/figure/Ice-crystal-shape-as-a-function-of-formation-temperature-and-supersaturation-with-respect\\_fig11\\_221917565](https://www.researchgate.net/figure/Ice-crystal-shape-as-a-function-of-formation-temperature-and-supersaturation-with-respect_fig11_221917565)

→ We followed this suggestion and reworked this paragraph in the manuscript. But the cirrus depolarization ratios increase as the temperatures drops based on in-situ measurements (e.g., Urbanek et al., 2018).

3) Page 2, lines 5-6: ‚According to theoretical ray-tracing simulations of laser backscatter depolarization (e.g. Takano and Liou, 1989), the geometric properties (shape and composition) of aerosols and ice crystals...’ Composition is not a geometric property.

→ Right! This should be ‘shape and size’. We changed that accordingly.

4) Page 2, lines 16-18: ‘... to study the characteristics of ice clouds (e.g. Schotland et al., 1971; Sassen, 1991; Ansmann et al., 2003; Groß et al., 2012; Urbanek et al., 2018). Please add here: Rolf et al. (2012) and Kienast-Sjögren et al. (2016). Rolf, C., Krämer, M., Schiller, C., Hildebrandt, M., and Riese, M.: Lidar observation and model simulation of a volcanic-ash-induced cirrus cloud during the Eyjafjallajökull eruption, *Atmos. Chem. Phys.*, 12, 10281–10294, <https://doi.org/10.5194/acp-12-10281-2012>, 2012. Kienast-Sjögren, E., Rolf, C., Seifert, P., Krieger, U. K., Luo, B. P., Krämer, M., and Peter, T.: Climatological and radiative properties of midlatitude cirrus clouds derived by automatic evaluation of lidar measurements, *Atmos. Chem. Phys.*, 16, 7605–7621, <https://doi.org/10.5194/acp-16-7605-2016>, 2016.

→ Thank you for this comment, we added the suggested references.

5) Page 2, lines 31-32: ‘This region was also used in a recent study by Schumann et al. (2021) to investigate air traffic and contrail changes during COVID-19.’ Better (because regions cannot be used ...): Recently, Schumann et al. (2021) investigated air traffic and contrail changes during COVID-19 in the same region.

→ Thank you for the suggestions. We reformed the sentence accordingly.

6) Page 2, lines 33-34: ‘To largely exclude the effect of meteorological conditions on cirrus occurrence and cirrus properties in our study, we extended this study to a larger ...’ At this point, it is not clear to the reader what your study is about .... this would have to be explained beforehand. I suggest to move the next paragraph (‘During the COVID-19 pandemic aviation ...’) before the sentence mentioned above (‘This region was also used ...’). Also, briefly explain which methods are applied by Schumann et al. (2021) to clearly show the differences/similarities of the two studies.

→ Thank you for the suggestions. We reformed the paragraph accordingly and updated the results from literature.

7) Page 3, lines 4-5: ‘Since In May/June 2020 aviation shows ...’

→ Revised, thank you.

8) Page 5, lines 11-12: ‘Cirrus ice crystals generally form in the outflow frontal of the deep convections and in the regions of ascending motions (producing the necessary supersaturation

of over ice), or they form by ice nucleation on aerosol particles in the upper troposphere (in-situ origin cirrus), or they appear in the cold outflow of frontal systems or convection as frozen cloud droplets that had formed at lower altitudes and warmer temperatures (liquid origin cirrus).’ The sentence was confusing, see the changes.

→ Changed, thank you.

9) Page 5, lines 12-13: ‘Aircraft emission of aerosols can lead to the formation of contrails depending on the surrounding meteorological conditions (including temperature, pressure, and humidity) of at the flight track.’ The contrails form on the aerosols emitted by aircraft, but not these aerosols lead to the formation, but the water vapor from the aircraft together with the surrounding meteorological conditions.

→ Reformed.

10) Page 5, lines 15-16: ‘In addition, the aerosols might also change the optical properties of naturally occurring cirrus clouds.’ Not the aerosols, but the appearing contrail or contrail-cirrus ice crystals might change the optical properties of naturally occurring cirrus clouds.

→ Changed.

11) Page 6, lines 1-2: ‘However, looking at the year to year variability for the time period MayAugust ...’ It would be good to show this, if not in the main article, then in an appendix or supplementary material.

→ Thank you for the comment. The cirrus occurrence and optical properties show a clear seasonal variation. We would not show supplementary material here as we are working on a long-term comparison and won’t publish part of the unfinished study in here.

12) Page 6, lines 3-5: ‘For the relative humidity we found that the relative humidity for those ranges ...’ (a) Avoid repetition of ‘relative humidity’ (b) What ranges do you mean here ? (c) Is this sentence at the right place here? The text continues with the ‘The largest agreement of the general situation in March/April 2020 ...’, Which general situation do you mean? The relative humidity is not shown ... or do you refer to Figure 1? (d) You continue with ‘Looking at the median and mean values of the general distribution ...’ Which ‘general distribution’ do you mean here ? Relative humidity ? Please clearly indicate what you describe here and, if it is relative humidity, it would be also good to show a figure comparable to Figure 1, if not in the main article, then in an appendix or supplementary material.

→ (a) thank you for pointing out; (b) altitude range of 8-13 km; (c) No, we refer to Figure 2 (right panel); (d) still relative humidity.

→ Thank you for the comments and sorry for the misleading. In the revised manuscript, we will compare the altitude profiles of temp, RH<sub>i</sub>, and vertical velocity derived from ERA-5. We reformed this paragraph accordingly.

13) Page 6, lines 10-11: Only now you mention Figure 2, containing information on relative humidity, which would be needed already above (see last comment): ‘The derived temperature and humidity along with their median and mean values in April are shown in Figure 2.’ But, why only April and not March-April is shown here ? In lines 20-21 you mention again that ‘So, we use CALIPSO data of March and April ...’ Or, better, show both months. And also, analyze both month seperately in Fig. 1 (see general comments). Same question for Table 2 (note also that ‘Medain’

should be 'Median' in the temperature column). And, Table 2 is redundant to Figure 2. It would be much more informative (and in the following for the reader easier to follow the discussion) to list the deviation of the years with respect to 2020 and then highlight the choice of the years for comparison with 2020. This choice can also be noted in the Table caption. 2014 2015 2016 2017 2018 2019 0.542 -0.264 1.827 -1.100 0.895 0.197 median T (C), difference to 2020

→ See comment above. In the revised manuscript, we changed the discussion on the meteorological conditions and included all the years from 2014 to 2019 in our comparison.

14) Page 6, line 16: '... a larger spread as found for the relative humidity. However, t The values differ ...'

→ See comment above. Figure 2 in the original manuscript was replaced by the results of ERA5.

15) Page 6, line 20: '... we mainly focus our analysis to the years 2014, 2017, 2019 and 2020.' I think you mean 2014, 2015 (not 2017), 2019 and 2020, yes (see line 17)? 2017 is quite different to 2020 in median T (see Table above), however, in Figures 3 (and following Figures) also 2017 is mentioned, though from Table 2 and line 17 2015 is closer to 2020 ? Is this a typo or did you analyze 2017 ? If this is the case, I recommend to redo the analyzes for the year 2015.

→ In the original manuscript, we selected the three years 2014, 2017, and 2019 as reference year according to the similar meteorological conditions. So there is no typo in using 2017. Thank you for the recommendation. We extended our analysis to all the years from 2014 to 2020 without pre-selection.

16) Page 7, lines 7-8: 'Even if we extend our examination (not shown) to the years 2015 ... ' ?? See previous comment – 2015 is quite close to 2020.

→ Please see the previous comment.

17) Page 7, line 9: 'And even for 2018 ...' The largest difference of median T (and mean relative humidity) to 2020 is in 2016.

→ We reworked our discussion on that.

18) Page 7, lines 16-17: 'The cirrus OR for a geometrical thickness of 2.0 km shows only minor reduction of overall about 4% compared to more than 5% of the reference years.' Calculating the percentage reduction of the geometrical thickness categories results in ~ 20 – 25 % for all categories; I do not see a minor reduction for geometrical thickness of 2.0 km. > 0.1 km 19.4 % (from 31% to 25%) > 0.3 km 21.4 % (from 28% to 22%) > 1.0 km 25.0 % (from 16% to 12%) > 2.0 km 20.0 % (from 5% to 4%)

→ Thank you for you comment, we changed that.

19) Page 7, lines 18-19: 'From the current analysis, it is striking to note that the cirrus OR in April 2020 are smaller by a factor of 30% ...' From the numbers in Table 3 it would be smaller than ~ 20 – 30% (see also previous comment). I recommend to also change that in the abstract and other places in the manuscript.

→ Changed. Thank you!

20) Page 7, lines 18-19: 'The average thickness of cirrus clouds in April 2020, however, is significantly smaller and reduced to only 1.18 km.' Do you have an explanation as to why that is ?

→ Here, the strong reduction of cirrus thickness with a mean of 1.18 km was found in March 2020 (sorry for the confusing). The reduction was supposed to be stronger than expected from the aviation change, since the meteorological conditions with warmer and drier airmasses in March 2020 were less favorable for ice cloud formation than the previous years.

21) Page 8, line 12: 3.2 Cirrus-Pparticle linear depolarization ratio

→ Changed.

22) Page 8, line 24: 'T = -50° C is one of the threshold conditions for contrail formation ...' If there is no contrail formation at warmer temperatures, then these clouds are most likely not influenced by aviation. I would think that then it would make sense to do the previous analyzes (Section 3.1) in addition also for T < -50° C, as you do it now for the PLDR, yes ? Otherwise possible effects from the warmer natural cirrus are mixed in the those of contrail cirrus. I also recommend to show the temperature (maybe median temperature at altitude intervals) on the right y-axis in Figure 3, left panel, to see the region of aviation influence.

→ It should be noted that the temperatures do not decrease monotonically with altitudes between 6 and 14 km covering the tropopause. It makes no sense to show the dependence of cirrus occurrence on temperatures, although we have done the analysis. Alternatively, we showed the cirrus occurrence at temperatures between -50 °C and -38 °C and below -50 °C, respectively, in the revised manuscript.

23) Page 9, line 2: condistions = conditions

→ Changed. Thank you.

24) Page 9, line 2: 'We also compare the vertical profiles of the PLDR median (Figure 7 - solid lines) along with the corresponding 20% and 80% percentiles (dashed lines) for the height range between 8 and 12.3 km. These are the typical cruising altitudes for passenger and cargo aircrafts. ' In Figure 7, I also recommend to introduce the median temperature at the right y-axis. In addition, the lower altitudes should also be shown to see the PDLR below the cruising altitude. From Figure 6, it is seen that the median PDLR at warmer temperatures is also lower in 2020 than in the other years. Since this is below the main cruising altitudes, does that not indicate that the natural cirrus clouds will also be reduced in 2020, perhaps due to the meteorology? That should be discussed here. (see also next comment)

→ See the answer to the question 22). It is true that the PLDR values in 2020 also show a reduction, to a smaller extent, at warmer temperatures, which, however, were detected at the altitudes between 6 and 11 km. Namely, cirrus clouds at warmer temperatures occurred also partly within the aviation cruising altitudes. You can see this feature in the middle panel of Figure 6 in the revised manuscript. Besides inducing the formation of contrails, aircraft emission aerosols also cause indirect effects on naturally occurring cirrus by increasing heterogeneous nucleation.

25) Page 9, line 24 ff: Test of the significance of differences between the cirrus PLDR in different years: I guess that you apply the test to the whole temperature range, yes ? Given the

differences of the PLDR in the two ranges ( $< > -50^{\circ} \text{C}$ ) discussed in the previous section, I recommend to carry out the tests for the two regions separately, especially because the influence of aviation should be visible in particular at the colder temperatures as this is the place where contrail / cotrail cirrus can form. In case you would find a difference at warmer temperatures, that would be an indication of a reason other than aviation. (see also last comment) Tables 4 and 5: Extend the captions, for example explain which parameter the test was applied to and what the meaning of  $p$  and  $h$  is.

→ Yes, we did the significance test for the whole temperature range ( $T < -38^{\circ} \text{C}$ ), but for the observations at altitudes between 8 and 13 km (the aviation cruising altitudes). It's stated in the last answer that the cirrus clouds occurring at warmer temperatures also partly appear at the aviation cruising altitudes. We added the explanation of  $p$  and  $h$ .

26) Page 11, line 6 ff: '... the occurrence rates (OR) of cirrus clouds over these three regions show that on average the cirrus clouds occurred more frequently over Europe and USA than over China. ...' The OR of cirrus clouds over these three regions are discussed, but not shown. I recommend to present plots in an Appendix or Supplementary material.

→ We added a figure to show the regional difference in the cirrus occurrence rates over the three areas.

27) Page 11- 12: PLDR in different regions: Are the meteorological conditions in the compared years also comparable over USA and China ?

→ We did not analyze the meteorological conditions so far. So, we reworked this section. According to a lately published article by *Righi et al. (2021)* we would not expect changes in the China region, as aviation effects on cirrus clouds is low in this region.

28) Page 12, lines 19-20: 'Due to the westerly jet stream, aerosol source is dominated by clean marine for the north Atlantic and European region and for the north American region, whereas by continental and dust for the Chinese region.' I don't see a connection between this sentence and the previous conclusions ? ... I would delete it.

→ We reworked this section and deleted this sentence.

29) Figure 1: Please indicate the unit in the color bar.

→ The unit in the color bar was added.

30) Figure 5: Please include a color bar. Caption: '... more red area indicating larger number densities.' Please check the language

→ A color bar was added. We reformed the sentence.
